# Supplementary material for: Promyelocytic Leukemia Protein (PML) Controls Listeria monocytogenes Infection
Source: PubMed Central journal article supplement (PMC5225316; doi:10.1128/mbio.02179-16), 2017-01-10
Supplement: mbo001163144sf1.pdf [file mbo001163144sf1.pdf]

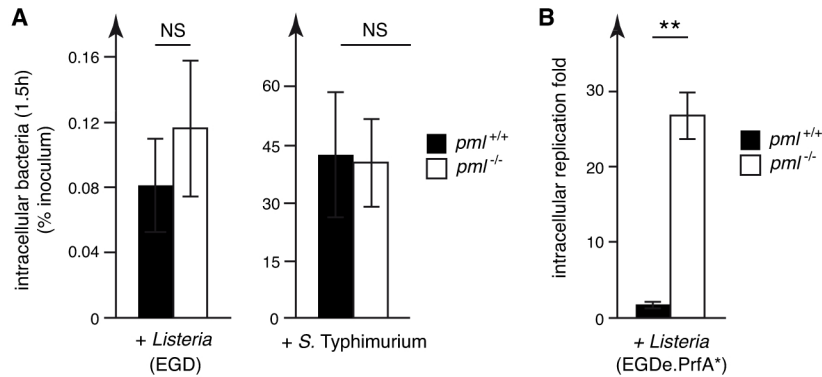

**Figure S1 : PML restricts bacteria intracellular replication but not bacterial entry in MEFs.** MEFs derived from  $pm1^{+/+}$  or  $pm1^{-/-}$  mice were infected by *L. monocytogenes* or *S. Typhimurium*. (A) Histograms correspond to the numbers of intracellular bacteria recovered after 1.5 h of infection, expressed as the percentage of the inoculum initially used for infection (mean results  $\pm$  SEM from 6 to 8 independent experiments; NS, not significant; unpaired two-tailed Student's *t* test). No significant differences were observed in bacterial numbers, suggesting that the internalization efficiencies of *Listeria* and *Salmonella* are similar in both  $pm1^{+/+}$  and  $pm1^{-/-}$  MEFs. (B) Histograms correspond to fold changes in bacterial intracellular replication, expressed as the ratio of intracellular bacteria at 24h versus 1.5h of infection (mean results  $\pm$  SD from 3 independent experiments; \*\*,  $P < 0.01$ ; unpaired two-tailed Student's *t* test). A significant increase in the replication efficiency is observed in  $pm1^{-/-}$  MEFs compared to that of  $pm1^{+/+}$  MEFs, indicating that PML restricts the intracellular replication of *Listeria* strain EGDe.PrfA\*.
