# Supplementary material for: Promyelocytic Leukemia Protein (PML) Controls Listeria monocytogenes Infection
Source: PubMed Central journal article supplement (PMC5225316; doi:10.1128/mbio.02179-16), 2017-01-10
Supplement: mbo001163144sf3.pdf [file mbo001163144sf3.pdf]

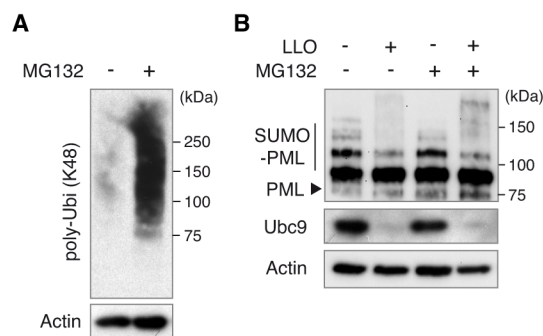

**Figure S3 : LLO induces PML de-SUMOylation rather than degradation.** (A) Immunoblot analysis using anti-K48-linked polyubiquitin and anti-actin antibodies of whole-cell lysates from CHO-PML cells preincubated with 10  $\mu$ M MG132 for 5 h. The level of proteins conjugated to K48-polyubiquitin chains increased after MG132 treatment, thus validating proteasome inhibition under these conditions. (B) Immunoblot analysis using anti-PML, anti-Ubc9 and anti-actin antibodies of whole-cell lysates from CHO-PML cells preincubated with 10  $\mu$ M MG132 for 5 h and then treated with 1 nM LLO for 20 min. Pretreatment with MG132 does not block loss of PML SUMOylated forms, suggesting that LLO triggers PML de-SUMOylation rather than degradation.
