# Supplementary material for: Promyelocytic Leukemia Protein (PML) Controls Listeria monocytogenes Infection
Source: PubMed Central journal article supplement (PMC5225316; doi:10.1128/mbio.02179-16), 2017-01-10
Supplement: mbo001163144sf4.pdf [file mbo001163144sf4.pdf]

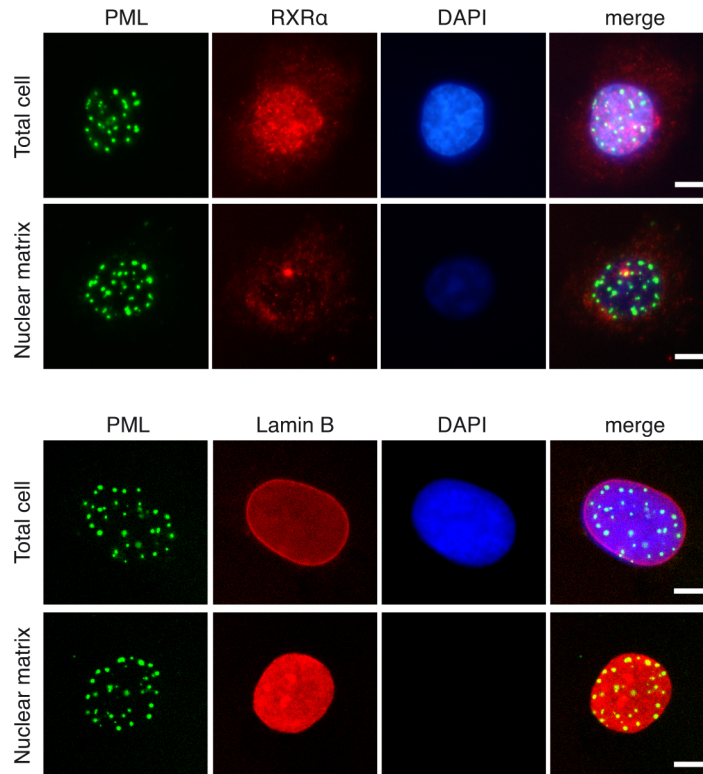

**Figure S4 : Control of *in situ* nuclear matrix preparations.** Immunofluorescence analysis of total nuclei from CHO-PML cells or nuclear matrix preparations using DAPI, anti-PML, anti-lamin B and anti-RXRα antibodies. As expected, after the high salt extraction and nuclease treatment used for nuclear matrix preparation, the nuclear soluble RXRα factor and DNA were removed, whereas lamin B and NB associated-PML, which belong to the nuclear matrix fraction, are still present. Scale bar, 5 μm.
