# Supplementary material for: Promyelocytic Leukemia Protein (PML) Controls Listeria monocytogenes Infection
Source: PubMed Central journal article supplement (PMC5225316; doi:10.1128/mbio.02179-16), 2017-01-10
Supplement: mbo001163144sf5.pdf [file mbo001163144sf5.pdf]

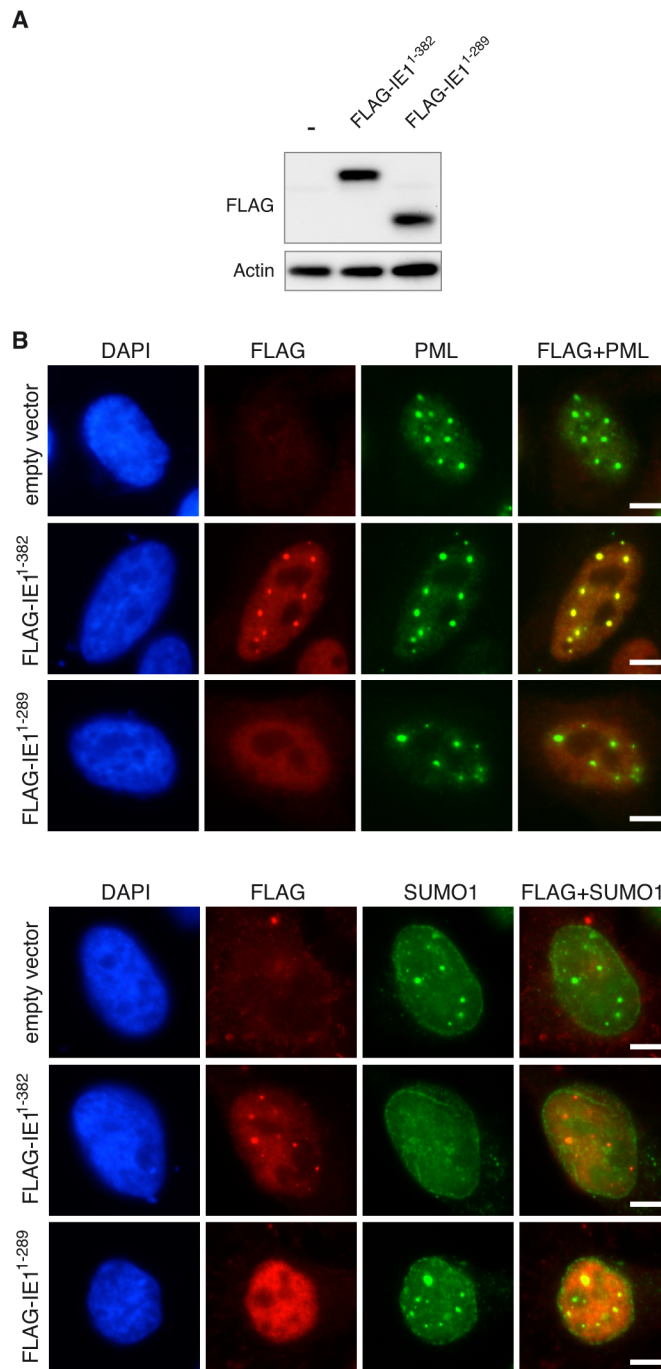

**Figure S5 : hCMV iE1<sup>1-382</sup> protein binds to PML and induces its de-SUMOylation.** (A) Immunoblot analysis using anti-FLAG and anti-actin antibodies of HeLa cells transfected with pCDNA.3 empty vector or expression vectors for FLAG-iE1<sup>1-382</sup> or iE1<sup>1-289</sup>. (B) Immunofluorescence analysis of nuclei from transfected HeLa cells stained with DAPI, anti-FLAG, anti-PML and anti-SUMO1 antibodies. The iE1<sup>1-382</sup> protein displays a nuclear localization, binds to PML, and induces its de-SUMOylation. The iE1<sup>1-289</sup> protein also has a nuclear localization but does not bind or de-SUMOylate PML. Scale bar, 5 μm.
