# Supplementary material for: Promyelocytic Leukemia Protein (PML) Controls Listeria monocytogenes Infection
Source: PubMed Central journal article supplement (PMC5225316; doi:10.1128/mbio.02179-16), 2017-01-10
Supplement: mbo001163144st4.pdf [file mbo001163144st4.pdf]

**Supplementary Table S4 : Primary antibody information.**

| <b>Targeted Protein</b>  | <b>Assay (dilution)</b>    | <b>Species</b> | <b>Source</b>             | <b>Reference</b> |
|--------------------------|----------------------------|----------------|---------------------------|------------------|
| Actin                    | WB (1:10,000)              | Mouse          | Sigma-Aldrich             | R5441            |
| Ubc9                     | WB (1:1,000)               | Mouse          | BD Biosciences            | 610748           |
| K48-linked polyubiquitin | WB (1:1,000)               | Rabbit         | Cell Signaling Technology | D9D5; #8081      |
| LLO                      | WB (1:20,000)              | Rabbit         | Home-made                 | R176             |
| PML                      | WB (1:2,000)               | Chicken        | Home-made                 |                  |
| PML                      | IF (1:500)                 | Mouse          | Home-made                 | 2'C7             |
| Sp100                    | WB (1:2,000)               | Rabbit         | Home-made                 |                  |
| SUMO1                    | WB (1:1,000)               | Rabbit         | Home-made                 | R204 (p)         |
| SUMO1                    | IF (1:100)                 | Rabbit         | Cell Signaling Technology | #4930            |
| SUMO3                    | WB (1:5,000)               | Rabbit         | Home-made                 | R205 (is2)       |
| SUMO3                    | IF (1:500)                 | Rabbit         | Home-made                 | R206 (p)         |
| Lamin B                  | IF (1:200)<br>WB (1:1,000) | Goat           | Santa Cruz Biotechnology  | M-20; sc-6217    |
| RXR $\alpha$             | IF (1:200)                 | Rabbit         | Santa Cruz Biotechnology  | D-20; sc-553     |
| FLAG                     | WB (1:1,000)<br>IF (1:200) | Mouse          | Sigma-Aldrich             | M2; F3165        |
| FLAG                     | IF (1:200)                 | Rabbit         | Sigma-Aldrich             | F7425            |
